# Supplementary material for: Distribution and Polymorphisms of Group I Introns in Mitochondrial Genes from Cryptococcus neoformans and Cryptococcus gattii
Source: MDPI journal article supplement (doi:10.3390/jof9060629), 2023-05-30
Supplement: s1 [file s1]

## Supplementary File S2 - Tables S1 and S2

**Table S1.** PCR products obtained for introns 1 and 2 of the *cob* gene from different *C. neoformans* and *C. gattii* isolates.

| Genotype | Isolate     | PCR intron 1 (bp) | PCR intron 2 (bp) |
|----------|-------------|-------------------|-------------------|
| VNI      | BT1         | 250               | 500               |
|          | BT2         | 250               | 1500              |
|          | BT3         | 250               | 1500              |
|          | BT4         | 250               | 1500              |
|          | BT5         | 250               | 1500              |
|          | BT6         | 250               | 1500              |
|          | BT7         | 250               | 1500              |
|          | BT9         | 250               | 1500              |
|          | BT10        | 250               | 1500              |
|          | BT11        | 250               | 500               |
|          | BT12        | 1000              | 1500              |
|          | BT13        | 250               | 1500              |
|          | BT15        | 250               | 1500              |
|          | BT16        | 250               | 1500              |
|          | BT18        | 250               | 1500              |
|          | BT22        | 250               | 500               |
|          | BT23        | 250               | 1500              |
|          | BT25        | 250               | 1500              |
|          | BT26        | 250               | 500               |
|          | HGT1        | 250               | 1500              |
|          | HGT3        | 250               | 500 and 1500      |
|          | HGT6        | 250               | 1500              |
|          | HGT7        | 250               | 1500              |
|          | HGT8        | 250               | 1500              |
|          | HGT9        | 250               | 1500              |
|          | HGT11       | 250               | 1500              |
|          | HGT12       | 250               | 1500              |
|          | HGT13       | 250               | 1500              |
|          | HGT15       | 250               | 1500              |
|          | HGT16       | 250               | 1500              |
|          | HGT17       | 250               | 1500              |
|          | HGT18       | 250               | 1500              |
|          | UFRN1       | 250               | 500               |
|          | UFRN2       | 250               | 500               |
|          | PI1543      | 250               | 1500              |
|          | PI1560      | 250               | 1500              |
|          | CN216       | 1200              | 1500              |
|          | LCR2002237  | 250               | 1500              |
|          | LCR2002368  | 1200              | 1500              |
|          | CFP55       | 250               | 1500              |
| VNII     | FC5 (WM626) | 250               | 500               |
|          | HGT2        | 1200              | 500               |
|          | CFP56       | 1200              | 500               |
| VNIII    | FC4 (WM628) | 1200              | 500               |
|          | CN117       | 1200              | 1500              |
|          | CFP57       | 1200              | 500               |
| VNIV     | BT28        | 1200              | 1500              |
|          | BT29        | 1200              | 1500              |
|          | FC2 (WM629) | 1200              | 1500              |
|          | FC7         | 1200              | 1500              |
|          | CFP58       | 1200              | 1500              |
| VGI      | BT14        | 1200              | 500               |
|          | CFP59       | 1200              | 800               |
| VGII     | BT8         | 600               | 1500              |
|          | BT17        | 600               | 1500              |
|          | BT20        | 600               | 1500              |
|          | BT21        | 600               | 1500              |
|          | BT24        | 600               | 1500              |
|          | BT27        | 250               | 500               |
|          | FC1 (WM178) | 600               | 1500              |
|          | FC6         | 250               | 1500              |
|          | HGT5        | 250               | 500               |
|          | HGT10       | 600               | 1500              |
|          | HGT14       | 600               | 1500              |
|          | HSL1        | 600               | 1500              |
|          | PI1401      | 600               | 1500              |
|          | CG606       | 600               | 1500              |
|          | CG201       | 600               | 1500              |
|          | CG751       | 250               | 500               |
|          | CG769       | 600               | 1500              |
|          | CN894       | 600               | 1500              |
|          | CN508       | 600               | 1500              |
| VGIII    | FC3 (WM161) | 250               | 500               |
|          | CFP61       | 1200              | 500 and 1500      |
| VGIV     | FC9 (WM779) | 250               | 500               |
|          | CFP62       | 250               | 500               |

In red the PCR products that were sequenced. Products of 250 and 500 bp, respectively for introns 1 and 2, indicate the absence of this element in these insertion sites, because they refer to the flanking exons only.



**Table S2.** PCR products obtained for introns 1, 2, 3 and 4 and 5 of the *cox1* gene from different *C. neoformans* and *C. gattii* isolates.

| Genotype | Isolate     | PCR intron 1 (bp) | PCR intron 2 (bp) | PCR intron 3 (bp) | PCR intron 4 e 5 (bp) |
|----------|-------------|-------------------|-------------------|-------------------|-----------------------|
| VNI      | BT1         | 600               | 200               | 160               | 300                   |
|          | BT2         | 600               | 200               | 160               | 300                   |
|          | BT3         | 600               | 200               | 160               | 300                   |
|          | BT4         | 600               | 200               | 160               | 300                   |
|          | BT5         | 600               | 200               | 160               | 300                   |
|          | BT6         | 600               | 200               | 160               | 300                   |
|          | BT7         | 600               | 200               | 160               | 300                   |
|          | BT9         | 600               | 200               | 160               | 300                   |
|          | BT10        | 600               | 200               | 160               | 300                   |
|          | BT11        | 600               | 200               | 160               | 300                   |
|          | BT12        | 600               | 200               | 1200              | 300                   |
|          | BT13        | 600               | 200               | 1200              | 300                   |
|          | BT15        | 600               | 200               | 160               | 300                   |
|          | BT16        | 600               | 200               | 160               | 300                   |
|          | BT18        | 600               | 200               | 160               | 300                   |
|          | BT22        | 600               | 200               | 160               | 300                   |
|          | BT23        | 600               | 200               | 160               | 300                   |
|          | BT25        | 600               | 200               | 160               | 300                   |
|          | BT26        | 600               | 200               | 160               | 300                   |
|          | HGT1        | 600               | 200               | 160               | 300                   |
|          | HGT3        | 600               | 200               | 160               | 300                   |
|          | HGT6        | 600               | 200               | 160               | 300                   |
|          | HGT7        | 600               | 200               | 160               | 300                   |
|          | HGT8        | 600               | 200               | 160               | 300                   |
|          | HGT9        | 600               | 200               | 160               | 300                   |
|          | HGT11       | 600               | 200               | 160               | 300                   |
|          | HGT12       | 600               | 200               | 160               | 300                   |
|          | HGT13       | 600               | 200               | 160               | 300                   |
|          | HGT15       | 600               | 200               | 160               | 300                   |
|          | HGT16       | 600               | 200               | 160               | 300                   |
|          | HGT17       | 600               | 200               | 160               | 300                   |
|          | HGT18       | 600               | 200               | 160               | 300                   |
|          | UFRN1       | 600               | 200               | 160               | 300                   |
|          | UFRN2       | 600               | 200               | 160               | 300                   |
|          | PI1543      | 600               | 200               | 160               | 300                   |
|          | PI1560      | 600               | 200               | 160               | 300                   |
|          | CN216       | 600               | 200               | 1200              | 300                   |
|          | LCR2002237  | 600               | 600               | 160               | 300                   |
|          | LCR2002368  | 600               | 600               | 1200              | 300                   |
|          | CFP55       | 600               | 600               | 160               | 300                   |
| VNII     | FC5 (WM626) | 1500              | 1200              | 160               | 300                   |
|          | HGT2        | 1500              | 1200              | 160               | 300                   |
|          | CFP56       | 1500 and 600      | 1200 and 200      | 160               | 300                   |
| VNIII    | FC4 (WM628) | 1500              | 1200              | 1200              | 1600 and 300          |
|          | CN117       | 1500              | 1200              | 1200              | 1600                  |
|          | CFP57       | 1500              | 1200              | 1200              | 1600 and 300          |
| VNIV     | BT28        | 1500              | 1200 and 200      | 1200              | 1600 and 300          |
|          | BT29        | 1500              | 1200              | 1200              | 1600 and 300          |
|          | FC2 (WM629) | 1500              | 1200 and 200      | 160               | 1600 and 300          |
|          | FC7         | 600               | 1200 and 200      | 1200 and 160      | 1600 and 300          |
| VGI      | CFP58       | 1500              | 1200              | 160               | 1600 and 300          |
|          | BT14        | 600               | 200               | 160               | 300                   |
|          | CFP59       | NR                | 200               | 500               | 1400                  |
| VGII     | BT8         | 1500              | 200               | 1200 and 160      | 2500 and 500 and 300  |
|          | BT17        | 1500 and 600      | 200               | 1200 and 160      | 2500 and 500 and 300  |
|          | BT20        | 600               | 200               | 160               | 300                   |
|          | BT21        | 1500 and 600      | 200               | 1200 and 160      | 1400 and 300          |
|          | BT24        | 1500 and 600      | 200               | 1200 and 160      | 2500 and 300          |
|          | BT27        | 1500 and 600      | 1200              | 1200 and 160      | 1400 and 300          |
|          | FC1 (WM178) | 1500 and 600      | 200               | NR                | 2500 and 500 and 300  |
|          | FC6         | 1500 and 600      | 200               | 1200 and 160      | 2500 and 1400         |
|          | HGT5        | 1500              | 200               | 1200 and 160      | 1400 and 300          |
|          | HGT10       | 600               | 1200              | 1200 and 160      | 1400 and 300          |
|          | HGT14       | 1500              | 200               | NR                | 300                   |
|          | HSL1        | 1500 and 600      | 200               | 1200 and 160      | 2500 and 300          |
|          | PI1401      | 1500 and 600      | 200               | 1200 and 160      | 1400 and 300          |
|          | CG606       | 1500              | 200               | 1200 and 160      | 2500 and 300          |
|          | CG201       | 1500              | 200               | 1200 and 160      | 2500 and 500 and 300  |
|          | CG751       | 1500              | 200               | 1200 and 160      | 1400 and 300          |
|          | CG769       | 1500              | 200               | 1200 and 160      | 1400 and 300          |
|          | CN894       | 1500              | 200               | 1200 and 160      | 2500 and 500 and 300  |
|          | CN508       | 1500              | 200               | 1200              | 2500 and 500 and 300  |
| VGIII    | FC3 (WM161) | 1500              | 1200 and 200      | 160               | 1500 and 300          |
|          | CFP61       | 1500 and 600      | 200               | 400               | 300                   |
| VGIV     | FC9 (WM779) | 1500 and 600      | 1300 and 200      | 160               | 1400                  |
|          | CFP62       | 600               | 1300              | 160               | 1400                  |

NR: non-reactive. In red the PCR products that were sequenced. Products of 600, 200, 160 and 300 bp, respectively for introns 1, 2, 3, 4/5 indicate absence of these elements in these insertion sites.
