# Supplementary material for: Distribution and Polymorphisms of Group I Introns in Mitochondrial Genes from Cryptococcus neoformans and Cryptococcus gattii
Source: MDPI journal article supplement (doi:10.3390/jof9060629), 2023-05-30
Supplement: s1 [file s1]

# Supplementary File S1 - Isolates

**Table S1.** *Cryptococcus neoformans* and *Cryptococcus gattii* isolates used in this work.

| Genotype | Isolate ID   | Isolate origin |
|----------|--------------|----------------|
| VNI      | BT1          | HC-SP          |
|          | BT2          | HC-SP          |
|          | BT3          | HC-SP          |
|          | BT4          | HC-SP          |
|          | BT5          | HC-SP          |
|          | BT6          | HC-SP          |
|          | BT7          | HC-SP          |
|          | BT9          | HC-SP          |
|          | BT10         | HC-SP          |
|          | BT11         | HC-SP          |
|          | BT12         | HC-SP          |
|          | BT13         | HC-SP          |
|          | BT15         | HC-SP          |
|          | BT16         | HC-SP          |
|          | BT18         | NI             |
|          | BT22         | HV-SP          |
|          | BT23         | HV-SP          |
|          | BT25         | HV-SP          |
|          | BT26         | HV-SP          |
|          | HGT1         | HGT-RN         |
|          | HGT3         | HGT-RN         |
|          | HGT6         | HGT-RN         |
|          | HGT7         | HGT-RN         |
|          | HGT8         | HGT-RN         |
|          | HGT9         | HGT-RN         |
|          | HGT11        | HGT-RN         |
|          | HGT12        | HGT-RN         |
|          | HGT13        | HGT-RN         |
|          | HGT15        | HGT-RN         |
|          | HGT16        | HGT-RN         |
|          | HGT17***     | HGT-RN         |
|          | HGT18***     | HGT-RN         |
|          | UFRN1**      | EI-RN          |
|          | UFRN2**      | EI-RN          |
|          | PI1543       | UFPI-PI        |
|          | PI1560       | UFPI-PI        |
|          | CN216        | IMT-SP         |
|          | LCR2002237   | LACEN-RN       |
|          | LCR2002368   | LACEN-RN       |
|          | CFP55        | UFRGS-RS       |
| VNII     | FC5 (WM626)* | WM             |
|          | HGT2         | HGT-RN         |
|          | CFP56        | UFRGS-RS       |
| VNIII    | FC4 (WM628)* | WM             |
|          | CN117        | IMT-SP         |
|          | CFP57        | UFRGS-RS       |
| VNIV     | BT28         | ATCC28958      |
|          | BT29         | ATCC28957      |
|          | FC2 (WM629)* | WM             |
|          | FC7          | FIOCRUZ-RJ     |
|          | CFP58        | UFRGS-RS       |
| VGI      | BT14         | HC-SP          |
|          | CFP59        | UFRGS-RS       |
| VGII     | BT8          | HC-SP          |
|          | BT17         | HC-SP          |
|          | BT20         | HV-SP          |
|          | BT21         | HV-SP          |

|       |              |            |
|-------|--------------|------------|
|       | BT24         | HV-SP      |
|       | BT27         | NI         |
|       | FC1 (WM178)* | WM         |
|       | FC6          | FIOCRUZ-RJ |
|       | HGT5         | HGT-RN     |
|       | HGT10        | HGT-RN     |
|       | HGT14        | HGT-RN     |
|       | HSL1         | HSL-RN     |
|       | PI1401       | UFPI-PI    |
|       | CG606        | IMT-SP     |
|       | CG201        | IMT-SP     |
|       | CG751        | IMT-SP     |
|       | CG769        | IMT-SP     |
|       | CN894        | IMT-SP     |
|       | CN508        | IMT-SP     |
| VGIII | FC3 (WM161)* | WM         |
|       | CFP61        | UFRGS-RS   |
| VGIV  | FC9 (WM779)* | FIOCRUZ-RJ |
|       | CFP62        | UFRGS-RS   |

**Legend:** NI – isolates with uninformed origin (from mycological collection of IBB-UNESP, Botucatu, São Paulo State, Brazil); HC - Botucatu Clinic hospital/UNESP, Botucatu, São Paulo State, Brazil; HV - Botucatu Veterinary hospital/UNESP, Botucatu, São Paulo State, Brazil; HGT - Giselda Trigueiro Hospital, Natal, Rio Grande do Norte State, Brazil; UFPI - Federal University of Piauí, Piauí State, Brazil; IMT-SP - Institute of Tropical Medicine of São Paulo, São Paulo, São Paulo State, Brazil; LACEN-RN, Central Laboratory of Rio Grande do Norte, Natal, Rio Grande do Norte State, Brazil; UFRGS-RS - Federal University of Rio Grande do Sul, Porto Alegre, Rio Grande do Sul State, Brazil; FIOCRUZ-RJ – Fundação Oswaldo Cruz, Rio de Janeiro, Rio de Janeiro State, Brazil; HSL-RN - São Lucas Hospital, Natal, Rio Grande do Norte State, Brazil; \*WM – from Wieland Meyer collection, University of Sydney, Australia [5]; \*\* EI- Environmental Isolate from pigeons feces, Alecrim, Natal, Rio Grande do Norte State, Brazil; \*\*\* Two new isolates not genotyped by Gomes et al. [25].
