# Supplementary material for: Distribution and Polymorphisms of Group I Introns in Mitochondrial Genes from Cryptococcus neoformans and Cryptococcus gattii
Source: MDPI journal article supplement (doi:10.3390/jof9060629), 2023-05-30
Supplement: s1 [file s1]

**Supplementary File S4** - Group I intron sequences (red) highlighting homing endonuclease genes (blue)

>BT8\_COB\_INTRON1\_VGII

ATTTAAATGCCCTATATGTTCTAATATTGTGATTATAGTGTATAAGTATCAAATACTATCATATTATTATATCAC  
AGTAAAGAATATAGTCATATATTATATATGGCGACACTGATGAAAACGGTTAAAAATCTATAATTTCTGATTCAG  
ACCGTCGGTACTATTATAGTGGTCGCTACAGACTGGTTCATCGGTGGGTATCATCTAAAATGGTGCTTAATGTAC  
AGTCGAAATTTCTATTAGATATAATATCTAATTACAAGGCCTGCATTTAAGACAGGTACATGGTCATATAATCGGA  
AATTTTTTATCGTATATGATTAGATAATTTG

>BT8\_COB\_INTRON2\_VGII

TTTATCCTTTGTCTAGTACCATTTCATGTATTTTCAGTTCTGAATTTATACCTACTGTAGGTAATGTGAATAGCCGA  
TCTATTCGTCCACGTAATAGTATGGACAAGAGTAAAGTATCAAAATGTTAGCTATGACTTCATATCTATGTTTGCTGG  
CTTTGTAGATGGAGACGGCTATATTAAGCTTACTCGGGCTACTGATGGTTATATCTCTTTGAGCTAGTTATTTCTCT  
AGACGTACGAGACGCAGAACTTCTACGCTATTTCTATTCTGTACTACAAGTAGGTCGTATTAACATTACAATACT  
ACAGTAAAGTATATTATTGGGCGAATCGATCTTCAAGAGATTGTATTTCTCTCTCTAATTCATCATGGTATTTATTTT  
ATTACTCATACACATCGGCAACAATATGCACTAGCTCTACATGTACTAATAATAATATTGTATGGTATGCTGACGT  
ACCCACTAATCTTAATTCTAATATCTACCCTCTACCTACTACACCAGCTGGATATCTATCTATTCCCTGGAATTGGGT  
TGTTGGTTTTGTTATGGCTGAAGGATCATTCCACATTAAGGCTTCTAATGAGTTTTATTTTTCTATCCGACAACGTG  
AACATATTACACTTTTTGAAGCTTTCCGAATTCATTTAATACAACCTCGAACTATTGACATATCTACTATTGGATATT  
CAAAGTTTAATGTTTCTCCGTTAAGGATCTAAATACTGTGGTTCAATTTCTTTTCATTACAGGGCTACACCGGTTACA  
AGAAGGTACAATATGACAATTGGATTAACAACATGCGAAACGTAAAGCGGTTAAGAATATTAACTGTCAGAA  
CATAAAGGATATAAAGTTGCTTTTTGAGGTGACTCAAATTGAAAAAAGGGTGAATTGCAAGAACTCTTAATC  
ATTTAACTTAACCCCTAGATTAAGACAATTTGCAGCTAAGTCTAGATTAGTATTTATATAAATCTAGAAAAGTTCA  
ACGACTAGTTGGTGAGTAATACTAACAATAATCCAACCTAGAGCGCCCTTTCACTCTAAACGTAGTGAATGACAT  
AGTCTAATCTTACTAGAAATAGTAAGCAGGCTTTTATAAGCTATAATGTTGTA

(HEG Accession cl24136, interval 148-366, E-value  $1.30 \times 10^{-03}$ )

>CFP61\_COB\_INTRON1\_VGIII

ATTTCAAATGCCCGATATGTTCTAATACTGTGATTATGCAGTTGTACTTGTACTTATTAATGTATATCTTCGGTCT  
GGAATGCTAGCTAAGCGAATTTTCAGCTATTAGCCGAGTAGGACCCCATATAACTATTCTTAGCATTATTACTG  
GTTCTCTCCTTGGAGATGGTCATGCTGAACAGCGAGTTCAAGGAAATGGTACTCGTATTACTTTCTATCAAGCAG  
AGAGTCATATAGAATATCTACTATGGCTGCATGAACCTTATCTCTTCTCTTGGTTATTGTAGCCCTATCACACCTAAA  
CACGTGTTGATAATGGAATCACTCGGTACGTAATTCGATTCCGAACTTACACATATAGTAGTTTTAACTTTATCTTT  
GGTATGTTAACGGCATTAAAGATTGTACCAGCTAATATTGCCATGTATCTTACTCCACTAGCACTTGCTATTTGGATT  
ATGGATGATGGTGGTTCGAATGGGTACGGTCTAAAGCTAGCAACAACTGCTTTACATATAATGACTGCGTATTT  
CTTTCTAACACTCTAGCAGAACTATATGGAATTAAGTCTTCAGTACAAAATGCTGGGGTACCTAACCAGTATCATA  
TTTATGTGTGGTCCGAATCTATGCCTCTACTACGAGATCTAGTTTCGACCATATTTTGTACCATCTATGCTTTATAAGC  
TAGGTGAATAACCCTTATATCATATAATATCCCGATCACAGTATAAGAATATAGTCATATTTATATATGGCGACAC  
TGATGAAAACGGTTAAAAATCTATAATTTCTGATTAAAGACCGTCGGTTACTATAATATTAGGATATTATTAGTGGT  
CGCTACAGACTGGTTCATCGGTGGGTATCATCTAAAATGATGCTTAATGTACAGTCGGAATTTCTATTAGATATATC  
TAATTATAAGGCCTGCGTTCCTTTTAATTTAGGATTTTAGACAGGTACATGGTCATATTCGGAAATTTTTTATCGTAT  
ATGATTAGATAATTTG

(HEG Accession cl03916, interval 139-294, E-value  $1.14 \times 10^{-13}$ )

(HEG Accession cl03916, interval 377-643, E-value  $5.80 \times 10^{-27}$ )

>CFP56\_COB\_INTRON1\_VNII

ATTTCAAATGCCCGACATGTTCTAATACTGTGATTATGCAGTTGTACTTGTACTTATTAATGTATATCTTCGGTCT  
GGAATGCTAGCTAAGCGAATTTTCAGCTATTAGCCGAGTAGGACCCCATATAACTATTCTTAGCATTATTACTG  
GTTCTCTACTTGGAGATGGTCATGCTGAACAGCGAGTTCAAGGAAATGGTACTCGTATTACTTTCTATCAAGCAG  
GTAGTCATATAGAATATCTACTATGGCTACATGAACCTTATCTCTTCTCTTGGTTATTGTAGCCCTATCACACCTGTTA  
TCCAAACACGTGTTGATAATGGAATCACTCGGTACGTAATTCGATTCCGAACTTACACATATAGTAGTTTTAACTT

TATCTTTTCAGATTGGTATGTTAACGGCATTAAAGATTGTACCAGCTAATATTGCCATGTATCTTACTCCACTAGCAC  
TTGCTATTTGGATTATCGATGATGGTGGTTCGAATGGGTACGGTCTAAAGCTAGCAACAACTGCTTTACATATA  
TGACTGCGTATTTCTTCTAACACTCTAGCAGAACTATATGGAATTAAGTCTTCAGTACAAAATGCTGGGGTACCT  
AACCAGTATCATATTTATGTGTGGTCCGAATCTATGCCTCTACTACGAGATCTAGTTCGACCATATTTTGTACCATC  
TATGCTTTATAAGCTAGGTGAATAACCTTATATCATATAATACTCCCCATCACAGTATAAGAATATAGTCATATTTAT  
ATATGGCGACACTGATGAAAACGGTTAAAAATCTATAATTTCTGATTACAGACCGTCGGTTACTATAATATTATGGA  
TATTATTAGTGGTCGCTACAGACTGGTTCATCGGTGGGTATCATCTAAAAATGGTGCTTAATGTACAGTCGGAATTT  
CTATTAGATATATCTAATTATAAGGCCTGCGTTCCTTTTAATTTAGGATTAAAGACAGGTACATGGTCATATTCGGA  
AATTTTTTATCGTATATGATTAGATAATTTG

(HEG Accession pfam03161, interval 139-657, E-value  $2.19 \times 10^{-57}$ )

>CFP58\_COB\_INTRON1\_VNIV

ATTTCAAATTGCCCGACATGTTCTAATACTGTGATTATGCAGTTGTACTAGTACTTATTAATGTATATCTTCGGTCT  
GGAATGCTAGCTAAGCGAATTTAGCTATTAGCCGAGTAGGACCCCATATAACTATTCTTAGCATTATTACTG  
GTTCTCTACTTGGAGATGGTCATGCTGAACAGCGAGTTCAAGGAAATGGTACTCGTATTACTTTCTATCAAGCAG  
GTAGTCATATAGAATATCTACTATGGCTACATGAACCTATCTCTCTCTGGTTATTGTAGCCCTATCACACCTGTTA  
TCCAAACACGTGTTGATAATGGAATCACTCGGTACGTAATTCGATTCCGAACCTACACATATAGTAGTTTTAACTT  
TATCTTTTCAGATTGGTATGTTAACGGCATTAAAGATTGTACCTATTGCCATGTATCTTACTCCACTAGCACTTGCTAT  
TTGGATTATGGATGATGGTGGTTCGAATGGGTACGGTCTAAAGCTAGCAACAACTGCTTTACATATAATGACTG  
CGTATTTCTTTCTAACACTCTAGCAGAACTATATGGAATTAAGTCTTCAGTACAAAATGCTGGGGTACCTAACCAG  
TATCATATTTATGTGTGGTCCGAATCTATGCCTCTACTACGAGATCTAGTTCGACCATATTTTGTACCATCTATGCTT  
TATAAGCTAGGTGAATAACCTTATATAATACTCCCCATCACAGTATAAGAATATAGTCATATTTATATATGGCGACA  
CTGATGAAAACGGTTAAAAATCTATAATTTCTGATTACAGACCGTCGGTTACTATAATATTATGGATATTATTAGTGG  
TCGCTACAGACTGGTTCATCGGTGGGTATCATCTAAAAATGGTGCTTAATGTACAGTCGGAATTTCTATTAGATATAT  
CTAATTATAAGGCCTGCGTTCCTTTTAATTTAGGATTAAAGACAGGTACATGGTCATATTCGGAATTTTTTATCGT  
ATATGATTAGAGAATTTG

(HEG Accession pfam03161, interval 139-651, E-value  $3.54 \times 10^{-55}$ )

>CFP58\_COB\_INTRON2\_VNIV

TTTATCCTTTGTCTAGTATCATTTTCATGTATTTTTCAGTTCAGAAATTTCTACCTACTGTAGGTAATATGAATAGTCGAT  
CTATTCATCCACGTAATAGTAAGGACAAGAGTAAGTATCAAAATGTTAGCTATGACTTCATATCTATGTTTGCTGG  
CTTTGTAGATGGAGACGGCTATATTAAGCTTACTCGGGCTACTGATGGTTATATCTCTTTTGAGCTAGTTATTTCTCT  
AGACGTACGAGACGCAGAACTTCTACGCTATTTCTATTCTGTACTACAAGTAGGTCGTATTAACATTACAATACT  
ACAGTAAAGTATATATTATGGGCGAATCGATCTTCAAGAGATTGTATTTCTCTCTCTAATTCATCATGGTATTATTTT  
CTTACTGATACACGTCGGCAACAATATGCACTAGCTCTACATGTACTAACTAATAATATTGTATGGTATGCAGACG  
TACCCACTAATTTTAATTTCTAATATCTACCCTCTACCTACTACTCCAGCTGGATATCTATCTATTCCTTTCTTCGGA  
ATTGGGTGTTGGTTTTGTATGGCTGAAGGATCATTCCACATTAAGGCTTCTAATGAGTTTTATTTCTCTATCCGA  
CAACGTGAACATATTACACTTTTTGAAGCTTTCGGAATTTCTATTTAATACGACTCGAACTATGGACATATCTACTAT  
TGGATATTCAAAGTTTAATGTTTCTTCCGTTAAGGATCTAAATACTGTGGTTCAATTCCTTTCTCATTCCGGGCTAC  
ATCCAATTGTAGGTTACAAGAAGGTACAATATGACAATTGGATTAACAACATACGAAACGTAAAGCGGTTTAAG  
AATATTAATCTGCCAGAACATAAAGGATATAAAGTTGCTTTTTGAGGTGACTCAAATTGAAAAAAGGGTGAA  
TTGCAAGAACTCTTAATCATATAACTCAACCCCTAGATTAAGACAATTTGCAGCTAAGTCTAGATTAGTATTTAT  
ATAAATCTAGAAAAGTTCAACGACTAGTTGGTGAGTAATACTAACAATAATCCAACCAAGAGCGCCCTTCACT  
CTAAACGTAGTGAATGACATAGTCTAATCTTACTAGAAATAGTAAGCAGGCTTTTATAAGCTATAATGTTGTA

(HEG Accession cl24136, interval 148-366, E-value  $1.31 \times 10^{-03}$ )

>FC4\_COB\_INTRON1\_VNIII

ATTTCAAATTGCCCGACATGTTCTAATACTGTGATTATGCAGTTGTACTTGTACTTATTAATGTATATCTTCGGTCT  
GGAATGCTAGCTAAGCGAATTTAGCTATTAGCCGAGTAGGACCCCATATAACTATTCTTAGCATTATTACTG  
GTTCTCTACTTGGAGATGGTCATGCTGAACAGCGAGTTCAAGGAAATGGTACTCGTATTACTTTCTATCAAGCAG  
GTAGTCATATAGAATATCTACTATGGCTACATGAACCTATCTCTCTCATGTAGCCCTATCACACCTGTTATCCAAA  
CACGTGTTGATAATGGAATCACTCGGTACGTAATTCGATTCCGAACCTACACATATAGTAGTTTTAACTTTATCTTT  
TCAGATTGGTATGTTAACGGCATTAAAGATTGTACCTATTGCCATGTCTCCACTAGCACTTGCTATTTGGATTATGGA  
TGATGGTGGTTCGAATGGGTACGGTCTAAAGCTAGCAACAACTGCTTTACATATAATGACTGCGTATTTCTTTCT  
AACACTCTAGCAGAACTATATGGAATTAAGTCTTCAGTACAAAATGCTGGGGTACCTAACCAGTATCATATTTATG

TGTGGTCCGAATCTATGCCTCTACTACGAGATCTAGTTCGACCATATTTTGTACCATCTATGCTTTATAAGCTAGGT  
GAAGAACCTTATATAATACTCCCCATCACAGTATAAGAATATAGTCATATTTATATATGGCGACACTGATGAAAAC  
GGTTAAAAATCTATAATTTCTGATTACAGACCGTCGGTTACTATAATATTATGGATATTATTAGTGGTCGCTACAGAC  
TGGTTCATCGGTGGGTATCATCTAAAATGGTGCTTAATGTACAGTCGGAATTTCTATTAGATATATCTAATTATAAG  
GCCTGCGTTCCTTTTAATTTAGGATTTAAGACAGGTACATGGTCATATTCCGAAATTTTTATCGTATATGATTAGG  
AGAATTG

(HEG Accession cl03916, interval 139-273, E-value  $1.55 \times 10^{-11}$ )

(HEG Accession cl03916, interval 291-638, E-value  $1.34 \times 10^{-30}$ )

>BT26\_COB\_INTRON2\_VNI

TTTATCCTTTGTCTAGTATCATTTTCATGTATTTTTCAGTTCAGAAATTTCTACCTACTGTAGGTAATATGAATAGTCGAT  
CTATTCATCCACGTAATAGTAAGGACAAGAGTAAGTATCAAAATGTTAGCTATGACTTCATATCTATGTTGCTGG  
CTTTGTAGATGGAGACGGCTATATTAAGCTTACTCGGGCTACTGATGGTTATATCTCTTTTGAGCTAGTTATTTCTCT  
AGACGTACGAGACGCAGAACTTCTACGCTATTTCTATTCTGTACTACAAGTAGGTCGTATTAACATTACAATACT  
ACAGTAAAGTATATTATTGGGCGAATCGATCTTCAAGAGATTGTATTTCTCTCTAATTCATCATGGTATTATTTT  
CTTACTGATACACGTCGGCAACAATATGCACTAGCTCTACATGTACTAACTAATAATATTGTATGGTATGCAGACG  
TACCCACTAATTTTAATTTCTAATATCTACCCTCTACCTACTACTCCAGCTGGATATCTATCTATTCTTTCTTTCCGA  
ATTGGGTTGTTGGTTTTGTTATGGCTGAAGGATCATTCCACATTAAGGCTTCTAATGAGTTTTATTTCTCTATCCGA  
CAACGTGAACATATTACACTTTTTGAAGCTTTCCGAATTTCTATTTAATACGACTCGAACTATTGACATATCTACTAT  
TGGATATTCAAAGTTTAATGTTTCTTCCGTTAAGGATCTAAATACTGTGGTTCAATTCCTTTCTCATTACAGGGCTAC  
ATCCAATTGTAGGTTACAAGAAGGTACAATATGACAATTGGATTAACAATATACGAAACGTAAAGCGGTTTAAG  
AATATTAATCTGCCAGAACATAAAGGATATAAAGTTGCTTTTTGAGGTGACTCAAATTGAAAAAAGGGTGAATT  
GCAAGAACTCTTAATCATATACTCAACCCCTAGATTAAGACAATTTGCAGCTAAGTCTAGATTAGTATTTATAT  
AAATCTAGAAAAGTTCAACGACTAGTTGGTGAGTAATACTAACAATAATCCAACCTAGAGCGCCCTTCACTCTA  
AACGTAGTGAATGACATAGTCTAATCTTACTAGAAATAGTAAGCAGGCTTTTATAAGCTATAATGTTGTA

(HEG Accession cl24136, interval 148-366, E-value  $1.62 \times 10^{-03}$ )

>CFP59\_COB\_INTRON2\_VGI

TTTATCCTTTGTCTAGTACCATTCCATGTATTTTAAAGTTCATAATTTCTACCTTCGAAGAGTAAATATTTAGACGTA  
CGAGACGCAGAACTTCTACGTATTCAATACTACAAGTATTACAATACAACACATAAAGGATATAAAGTTGCTTTT  
TGAGGTGACTCAAATTGAAAAAAGGGTGAATTGCAAGAACTCTTAATCATTTAACTCAACCCCTAGATTAAG  
ACAATTTGCAGCTAAGTCTAGATTAGTATATATATAAATCTAGAAAAGTTCAACGACTAGTTGGTGAGTAATACTA  
ACACTAATCCAACGTAGAGCGCCCTTCACTATAAACGTAGCGAATGACATAGTCTAATCTTACTAGAAATAGTA  
AGCAGGCTTTTATAAGATATAATGTAGTA

>HGT17\_COB\_INTRON2\_VNI

TTTATCCTTTGTCTAGTATCATTTTCATGTATTTTTCAGTTCAGAAATTTCTACCTACTGTAGGTAATATGAATAGTCGAT  
CTATTCATCCACGTAATAGTAAGGACAAGAGTAAGTATCAAAATGTTAGCTATGACTTCATATCTATGTTGCTGG  
CTTTGTAGATGGAGACGGCTATATTAAGCTTACTCGGGCTACTGATGGTTATATCTCTTTTGAGCTAGTTATTTCTCT  
AGACGTACGAGACGCAGAACTTCTACGCTATTTCTATTCTGTACTACAAGTAGGTCGTATTAACATTACAATACT  
ACAGTAAAGTATATTATTGGGCGAATCGATCTTCAAGAGATTGTATTTCTCTCTAATTCATCATGGTATTATTTT  
CTTACTGATACACGTCGGCAACAATATGCACTAGCTCTACATGTACTAACTAATAATATTGTATGGTATGCAGACG  
TACCCACTAATTTTAATTTCTAATATCTACCCTCTACCTACTACTCCAGCTGGATATCTATCTATTCTTTCTTTCCGA  
ATTGGGTTGTTGGTTTTGTTATGGCTGAAGGATCATTCCACATTAAGGCTTCTAATGAGTTTTATTTCTCTATCCGA  
CAACGTGAACATATTACACTTTTTGAAGCTTTCCGAATTTCTATTTAATACGACTCGAACTATTGACATATCTACTAT  
TGGATATTCAAAGTTTAATGTTTCTTCCGTTAAGGATCTAAATACTGTGGTTCAATTCCTTTCTCATTACAGGGCTAC  
ATCCAATTGTAGGTTACAAGAAGGTACAATATGACAATTGGATTAACAATATACGAAACGTAAAGCGGTTTAAG  
AATATTAATCTGCCAGAACATAAAGGATATAAAGTTGCTTTTTGAGGTGACTCAAATTGAAAAAAGGGTGAATT  
GCAAGAACTCTTAATCATATACTCAACCCCTAGATTAAGACAATTTGCAGCTAAGTCTAGAATAAGTATTTA  
TATAAATTTAGAAAAGTTCAACGAATAAGTTGGTGAATAATACTAACAATAATCCAACCTAGAGCGCCCTTCA  
CTCTAAACGTAGTGAATGACATAGTCTAATCTTACTAGAAATAGTAAGCAGGCTTTTATAAGCTATAATGTTGTA

(HEG Accession cl24136, interval 148-366, E-value  $1.63 \times 10^{-03}$ )

>FC4\_COX1\_INTRON1\_VNIII

TTTAATTGGCCCCCTTTGGAACGCGAGTTTCAATAAGCACTGTGCTATTTGCTGGAACAGTCTGCAACTAGGTGTC  
ATTACTATGGTAATAAGTGGCCATCTATGGTCCCTATCTAGTCAAAATATGGCATCTAAGACTCAATCAGCAGGTA  
ACCAACGACGCTATAATAGCAGTCTAGTAGGAACCTCAGAGACTACACGCACAGCTGCTCCTTTTTTCAAGCT  
TTCTGCCAATGGCTAGCCGGTCTAATTGATGGTGATGGCTGTCTTCTCGTATCTAAGCAAGGGTACACTAGTCTAG  
AAATCACAGTAGGGCTAGAGGATCTTCCTCTATTCCGATATATTCAAAATAAGCTAGGTGGCTCTATTAAGATGCG  
AAGTGGGGCAAAGGCTTATCGCTATCGACTACACAACCAACAAGGAATGATTCAACTTGTAACCTGTATCAATG  
GATACATCCGACATAGTACTCGTCTTCTACAACCTACATCACGTTTGCCAACAACCTAACATTCTTATTATTACACC  
AGGACCTCTATCTATCACATCTGCCTGGTTTGCTGGTTTCTTTGATGCAGATGGAACCTATTGGGTCTCTATTAAGA  
ATGGTACTCCACAACCTAGTGTACGAGTCACAAATAAGCTTCTTCAAGATGTTTCATGTTATATGGATATCTTTGGT  
GGAAATATTTACTTTGATAGTGCACAGAACGGTTATTATCAATGGTCTATTCAAAATAAGACTGATGTTATTGCTT  
GTTCTAAGTATTTTATTCAATATTGTGCAAGCAATAAGTCTCGACGATTTTTCCTTATTGAAGAATATTACTCTCTTG  
TGTCACCTTCGGGCACATAAGTCTGAAAGTGATCATCATAAGGCATGGCTAGCCTTTATAGAAAAGTGGAAATAAG  
AAGTAGAAGATATAGTCCAAATAATATATTATAATATATTATAG

(HEG Accession pfam00961, interval 238-480, E-value  $2.92 \times 10^{-06}$ )

>BT28\_COX1\_INTRON1\_VNIV

TTTAATTGGCCCCCTTTGGAACGCGAGTTTCAATAAGCACTGTGCTATTTGCTGGAACAGTCTGCAACTAGGTGTC  
ATTACTATGGTAATAAGTGGCCATCTATGGTCCCTATCTAGTCAAAATATGGCATCTAAGACTCAATCAGCAGGTA  
ACCAACGACGCTATAATAGCAGTCTAGTAGGAACCTCAGAGACTACACGCACAGCTGCTCCTTTTTTCAAGCT  
TTCTGCCAATGGCTAGCCGGTCTAATTGATGGTGATGGCTGTCTTCTCGTATCTAAGCAAGGGTACACTAGTCTTG  
AAATCACAGTAGGGCTAGAGGATCTTCCTCTATTCCGATATATTCAAAATAAGCTAGGTGGCTCTATTAAGATGCG  
AAGTGGGGCAAAGGCTTATCGCTATCGACTACACAACCAACAAGGAATGATTCAACTTGTAACCTGTATCAATG  
GATACATCCGACATAGTACTCGTCTTCTACAACCTACATCACGTTTGCCAACAACCTAACATTCTTATTATTACACC  
AGGACCTCTATCTATCACATCTGCCTGGTTTGCTGGTTTCTTTGATGCAGATGGAACCTATTGGGTCTCTATTAAGA  
ATGGTACTCCACAACCTAGTGTACGAGTCACAAATAAGCTTCTTCAAGATGTTTCATGTTATATGGATATCTTTGGT  
GGAAATATTTACTTTGATAGTGCACAGAACGGTTATTATCAATGGTCTATTCAAAATAAGACTGATGTTATTGCTT  
GTTCTAAGTATTTTATTCAATATTGTGCAAGCAATAAGTCTCGACGATTTTTCCTTATTGAAGAATATTACTCTCTTG  
TGTCACCTTCGGGCACATAAGTCTGAAAGTGATCATCATAAGGCATGGCTAGCCTTTATAGAAAAGTGGAAATAAG  
AAGTAGAAGATATAGTCCAAATAATATATTATAATATATTATAG

(HEG Accession pfam00961, interval 238-480, E-value  $2.92 \times 10^{-06}$ )

>BT27\_COX1\_INTRON1\_VGII

TTTAATTGGCCCCCTTTGGAATGTAAGTTCCAATAAGCACTGTGCTATTTGCTGGAACAGTCTGCAACTAGGTGTCA  
TTACTATGGTAATAAGTGGCCATCAATGGTCCCTATCTAGTCAAAATATGACATCTAAGACTCAATCAGCAGGTA  
ACCAACGACGCTATAATAGCAGTCTAGTAGGAACCTCAGAGACTACACGCACAGCTGCTCCTTTTTTCAAGCT  
TTCTGTGAATGGCTAGCTGGTCTAATTGATGGTGATGGTGTCTTCTCGTATCTAAGCAAGGGTACACTAGTCTTG  
AAATCACTGTAGGGCTAGAGGATCTTCCTCTACTCCGATATATTCAAAACAAGCTAGGTGGTCTATTAAGATGC  
GAAGTGGAGCAAAGGCTTATCGCTATCGACTACACAACCGACAGGGAATAATTCAACTTGTAACCTGTATCAAT  
GGATATATTTCGACATAGTACTCGTCTTCTACAACCTACATCATGTTTGCCAACAACCTAACATTTCTATTATTACACC  
AGGATCTCTATCTGTTGCATCTGCCTGGTTTGCTGGTTTCTTTGATGCAGATGGTACTATAGGGTCTCTATTAAGA  
ATGGTATCCACAACCTAGTGTACGAGTCACAAATAAGCTTCTTCAAGATGTTTCATGTTATATGGATATCTTTGGT  
GGTAATATTTACTTTGATAGTGCACAGAACGGTTATTATCAATGGTCTATTCAAAGTAAGACTGATGTTATTGCTTG  
TTCTAAGTATTTGTTCAATATTGTGCAAGCAATAAGTCTCGACGATTTTTCCTTGTGAAGAATATTATTCTCTAAT  
TTCACCTTAAGGCATATATGTCTGATAGTGATTATTATAAGGTATGGCTAGCCTTTATAGAAAAGTGGAAATAAGAG  
TAGATGATATAGTCCAAATAATATATAATAATATATTATAG

(HEG Accession pfam00961, interval 238-480, E-value  $3.83 \times 10^{-07}$ )

>FC3\_COX1\_INTRON1\_VGIII

TTTAATTGGCCCCCTTTGGAACGCGAGTTTCAATAAGCACTGTGCTATTTGCTGGAACAGTCTGCAACTAGGTGTC  
ATTACTATGGTAATAAGTGGCCATCTATGGTCCCTATCTAGTCAAAATATGGCATCTAAGACTCAATCAGCAGGTA  
ACCAACGACGCTATAATAGCAGTCTAGTAGGAACCTCAGAGACTACACGCACAGCTGCTCCTTTTTTCAAGCT  
TTCTGCCAATGGCTAGCCGGTCTAATTGATGGTGATGGCTGTCTTCTCGTATCTAAGCAAGGGTACACTAGTCTTG  
AAATCACAGTAGGGCTAGAGGATCTTCCTCTATTCCGATATATTCAAAATAAGCTAGGTGGCTCTATTAAGATGCG  
AAGTGGGGCAAAGGCTTATCGCTATCGACTACACAACCAACAAGGAATGATTCAACTTGTAACCTGTATCAATG

GATACATCCGACATAGTACTCGTCTTCTCAAACTACATCACGTTTGCCAACAACCTTAACATTCTTATTATTACACC  
AGGACCTCTATCTATCACATCTGCCTGGTTTGCTGGTTTCTTTGATGCAGATGGAACCTATTGGGTTCTCTATTAAGA  
ATGGTACTCCACAACCTTAGTGTACGAGTCACAAATAAGCTTCTTCAAGATGTTTCATGTTATATGGATATCTTTGGT  
GGAAATATTTACTTTGATAGTGCACAGAACGGTTATTATCAATGGTCTATTCAAAAATAAGACTGATGTTATTCGTT  
GTTCTAAGTATTTTATTCAATATTGTGCAAGCAATAAGTCTCGACGATTTTTCCTTATTGAAGAATATTACTCTCTTG  
TGTCACCTTCGGGCACATAAGTCTGAAAGTGATCATCATAAGGCATGGCTAGCCTTTATAGAAAAGTGGAATAAG  
AAGTAGAAGATATAGTCCAAATAATATTATAATATTATATAG

(HEG Accession pfam00961, interval 238-480, E-value  $2.92 \times 10^{-06}$ )

>CFP56\_COX1\_INTRON2\_VNII

TGCTACATAAATAAGCGAAAGCTTAATTATGTAACAGGTGGCCCTTACTGTTCTTCTATCTCAGAAGACAGTTATG  
CAACATACTATATGCGGGAACGGCAGAATATTCTGATTTGTACTCGGATTACACTAATGACTATTGTGATTTTTTCG  
ACAATAGCATATCCAGTAATAATCAATTCAGAACTGCCAATCCGCAGGAAACCAACGCACCTTTATTACATACTA  
GGTCTTCTAGTAGAATATAGCATGCTAGTAGGATCCTCAGAGACTGTACGTATGTTCTCAACTATTATGACATCAC  
ACGAGAAGTCAGATCTAAAGATTCGACAGTGGATTGCCGGAGTTATCGATGGCGACGGTTATTTTGGCATTAGTA  
AGCTAGGTCATGTTTCACTAGAAGTCGTGATGGAACCTACGTGATGAAGCTTGTCTATAACAAGCTAAAGCATCGTT  
ATGGCGGTTCTGTTAAGGCTACTTCGCATGCTAAGGCTCTTCGTTTCCGTCTACATCATAAGGCAGGGATTCTAGC  
AGTTATTAATGATCTTAATGGTCTGCTATATAATCCTGTCCGTATCCAACAATTCCAAAAGGTATGCGCACTTTACA  
ATGTGACATATCTAACACCTACACCACTAGAGTATATTAGTGCTTACATGTCAGGACTTTTTGACAGTGATGGTAG  
CATCTATCTTAATATCACTTCTCAACAAGTATTTATTACTATCTCTCAAAAGTCACCTGAACTCCTTGATATTATCG  
TTCTGTTTATGGAGGAAAGGTATATTCATGTAACGCAAAGAATACTGCTTACAAGTGACGGTATGTGCGAAAGTC  
GGAAGTACTAAGCCTAATTAATGACTATTTTCACTGGAACGGTTGCGTTTCAGCTAAGAACAAGCGTTTCGGAAT  
AGTTAAGGAATTTTATCGACTATCATCTGTAGGTGCCACTAAGGCTACAATTGACTCACCATCAGGTAAGTCTCTC  
CTACAATTTAAGGAACGTTGGGATAGCTACGACAACCTCATAATAATTGTTAAAGATACAGTCCACTTATTTTTTAA  
AAATAATAG

(HEG Accession pfam14528, interval 637-768, E-value  $2.27 \times 10^{-04}$ )

>FC4\_COX1\_INTRON2\_VNIII

TGCTACATAAATAAGCGAAAGCTTAATTATGTAACAGGTGGCCCTTACTGTTCTTCTATCTCAGAAGACAGTTACG  
CAACATACTATATGCGGGAACGGCAGAATATTCTGATTTGTACTCGGATTACACTAATGACTATTGTGATTTTTTCG  
ACAATAGCATATCCAGTAATAATCAATTCAGAACTGCCAATCCGCAGGAAACCAACGCACCTTTATTACATACTA  
GGTCTTCTAGTAGAATATAGCATGCTAGTAGGATCCTCAGAGACTGTACGTATGTTCTCAACTATTATGACATCAC  
ACGAGAAGTCAGATCTAAAGATCCGACAGTGGATTGCCGGAGTTATCGATGGCGACGGTTATTTTGGCATTAGTA  
AGCTAGGTCATGTTTCACTAGAAGTCGTGATGGAACCTACGTGATGAAGCTTGTCTATAACAAGCTAAAGCATCGTT  
ATGGCGGTTCTGTTAAGGCTACTTCGCATGCTAAGGCTCTTCGTTTCCGTCTACATCATAAGGCAGGGATTCTAGC  
AGTTATTAATGATCTTAATGGTCTGCTATATAATCCTGTCCGTATCCAACAATTCCAAAAGGTATGCGCACTTTACA  
ATGTGACATATCTAACACCTTCACCACTAGAGTATATTAGTGCTTACATGTCAGGACTTTTTGACAGTGATGGTAG  
CATCAATCTTAATATCACTTCTCAACAAGTATTTATTACTATCTCTCAAAAGTCACCTGAACTCCTTGATATTATCG  
CTTCTGTTTATGGAGGAAAGGTATATTCATGTAACGCAAAGAATACTGCTTACAAGTGACGGTATGTGCGAAAGT  
CGGAAGTACTAAGCCTAATTAATGACTATTTTCACTGGAACGGTTGCGTTTCAGCTAAGAACAAGCGTTTCGGA  
TAGTTAAGGAATTTTATCGACTATCATCTGTAGGTGCCACTAAGGCTACAATTGACTCACCATCAGGTAAGTCTCT  
CCTACAATTTAAGGAACGTTGGGATAGCTACGACAACCTCATAATAATTGTTAAAGATACAGTCCACTTATTTTTT  
AAATAATAG

(HEG Accession pfam14528, interval 637-768, E-value  $3.20 \times 10^{-04}$ )

>BT28\_COX1\_INTRON2\_VNIV

TGCTACATAAATAAGCGAAAGCTTAATTATGTAACAGGTGGCCCTTACTGTTCTTCTATCTCAGAAGACAGTTACG  
CAACATACTATATGCGGGAACGGCAGAATATTCTGATTTGTACTCGGATTACACTAATGACTATTGTGATTTTTTCG  
ACAATAGCATATCCAGTAATAATCAATTCAGAACAGCCCAATCCGCAGGAAACCAACGCACCTTTATTACATACTA  
GGTCTTCTAGTAGAATATAGCATGCTAGTAGGATCCTCAGAGACTGTACGTATGTTCTCAACTATTATGACATCAC  
ACGAGAAGTCAGATCTAAAGATCCGACAGTGGATTGCCGGAGTTATCGATGGCGACGGTTATTTTGGCATTAGTA  
AGCTAGGTCATGTTTCACTAGAAGTCGTGATGGAACCTACGTGATGAAGCTTGTCTATAACAAGCTAAAGCATCGTT  
ATGGCGGTTCTGTTAAGGCTACTTCGCATGCTAAGGCTCTTCGTTTCCGTCTACATCATAAGGCAGGGATTATAGC  
AGTTATTAATGATCTTAATGGTCTGCTATATAATCCTGTCCGTATCCAACAATTCCAAAAGGTATGCGCACTTTACA  
ATGTGACATATCTAACACCTTCACCACTAGAGTATATTAGTGCTTACATGTCAGGACTTTTTGACAGTGATGGTAG

CATCAATCTTAATATCACTTCTCAACAAGTATTTATTACTATCACTCAGAAGTCACCTGAACTCCTTGATATTATCG  
CTTCTGTTTATGGAGGAAAGGTATATTCATGTAACGCAAAGAATACTGCTTACAAGTGGACGGTATGTCAAAAGT  
CGGAAGTACTAAACCTAATTGATGACTATTTTCACTGGAACGGTTGCGTTTCAGCTAAGAACAAGCGTTTCGGAA  
TAGTTAAGGAATTTTATCGACTATCATCTGTAGGTGCCACTAAGGCTACAATTGACTCACCATCAGGTAAGTCTCT  
CCTACAATTTAAGGAACGTTGGGATAGCTACGACAACCTCATAATAATTGTTAAAGATACAGTCCACTTATTTTTT  
AAATAATAG

(HEG Accession pfam14528, interval 637-768, E-value  $1.56 \times 10^{-04}$ )

>BT27\_COX1\_INTRON2\_VGII

TGCTACATAATAAGCGAAAGTCTTATTATGTAACAGGTGGCCCTTACTGTTCTCCTATCTCAGATAACAGTAACGC  
AACATACTATATGCGGGAACGACAGATTATTCTGATTTGTAAGTACTCGGATTACACTAATGACTATTGTATATTCAA  
TAATAGCATATCCAGTAATAATCAATTCAGAAGTGTCCAATCCGCAGGAAACCAACGCACCTTTATTACATACTAG  
GTCTTCTAGTAGAATATAGCATGCTAGTAGGATCCTCAGAGACTGTACGTATGTTTTCAACTATTATGACATCACAT  
GAGAAGTCGGATCTAAAGATTCGACAGTGGATTGCGGGAGTTATCGACGGAGACGGTTGTTTCTGCATTAGTAA  
GCTAGGTTATGTTTCACTAGAAGTCGTGATAGAACCACGTGATGGAGCTTGCTTTACAAGCTAAAGCATCGTTA  
TGGCGGTTCTGTTAAGGCTACTTCACATGCTAAGGCTCTTCGTTTCCGTCTACATCATAAGGCAGGTATTCAAGCG  
GTAATTAATGATCTTAATGGTCTGCTATATAATCCTGTCCGTATCCAACAATTCCAAAAGGTATGTACACTATATAA  
TGTAACATATCTAACACCTTCACCACTAGAGTATATTAATGCTTACATGTACAGGACTTTTTGATAGTGATGGTAGC  
ATCTATGTAAATATTATCTCTCAACAAGTATTTATTACTATCTCTCAAAAGTCACCTGAACTTCTTGATATTATCGCT  
TCTGTTATGGAGGAAAGGTATATCCATGTAATGCTAAGAAGACTGCTTACAAGTGGACGGTATGTGCGAAAGTCT  
GATGTACTAAATCTAATTAATGATTATTTTCACTGGAACGGTTGCGTTTCAGCTAAGAATAAGCGTTTGGAAATAG  
TAAAGGAATTTATCGACTATCATCTGAAGGTGCTACTAAGGCTACAATTGACTCACCATCAGGTAAGTCTCTTCT  
ACAATTTAAGGAACGTTGGGATAGCTACGACAACCTCATAATAGTCGTTAAAGATACAGTCCATTTATTTAAATA  
AAG

(HEG Accession pfam14528, interval 636-767, E-value  $2.75 \times 10^{-04}$ )

>FC3\_COX1\_INTRON2\_VGIII

TGCTACATAAAATAAGCGAAAGCTTAATTATGTAACAGGTGGCCCTTACTGTTCTTCTATCTCAGAAGACAGTTACG  
CAACATACTATATGCGGGAACGGCAGAATATTCTGATTTGTAAGTACTCGGATTACACTAATGACTATTGTATTTTTCG  
ACAATAGCATATCCAGTAATAATCAATTCAGAACAGCCCAATCCGCAGGAAACCAACGCACCTTTATTACATACTA  
GGTCTTCTAGTAGAATATAGCATGCTAGTAGGATCCTCAGAGACTGTACGTATGTTCTCAACTATGATGACATCAC  
ACGAGAAGTCAGATCTAAAGATCCGACAGTGGATTGCCGGAGTTATCGATGGCGACGGTTATTTTGGCATTAGTA  
AGCTAGGTCATGTTTCACTAGAAGTCGTGATGGAACACTCGTGATGAAGCTTGCTATACAAGCTAAAGCATCGTT  
ATGGCGGTTCTGTTAAGGCTACTTCGCATGCTAAGGCTCTTCGTTTCCGTCTACATCATAAGGCAGGGATTATAGC  
AGTTATTAATGATCTTAATGGTCTGCTATATAATCCTGTCCGTATCCAACAATTCCAAAAGGTATGCGCACTTTACA  
ATGTGACATATCTAACACCTTCACCACTAGAGTATATTAGTGCTTACATGTACAGGACTTTTTGACAGTGATGGTAG  
CATCAATCTTAATATCACTTCTCAACAAGTATTTATTACTATCACTCAAAAGTCACCTGAACTCCTTGATATTATCG  
CTTCTGTTTATGGAGGAAAGGTATATTATGTAACGCAAAGAATACTGCTTACAAGTGGACGGTATGTGCGAAAGT  
CGGAAGTACTAAGCCTAATTAATGACTATTTTCACTGGAACGGTTGCGTTTCAGCTAAGAACAAGCGTTTCGGAA  
TAGTTAAGGAATTTATCGACTATCATCTGTAGGTGCCACTAAGGCTACAATTGACTCACCATCAGGTAAGTCTCT  
CCTACAATTTAAGGAACGTTGGGATAGCTACGACAACCTCATAATAATTGTTAAAGATACAGTCCACTTATTTTTT  
AAATAATAG

(HEG Accession pfam14528, interval 637-768, E-value  $1.55 \times 10^{-04}$ )

>FC9\_COX1\_INTRON2-3\_VGIV

TTTTAAACAAATTATAATTTGTGGTTGGCTCTCCTCTATCGCAAGATAAAGGTAATAAATTTTCGCTATATGCTGGAA  
CAGTTTAAACGATAATCAATACTAATTTAAATATTAGTGAAAATTTGATTGTTTACACTCAATCAGCAGGTAACCAA  
CAACTATATAGTTTAGTAGGAACCTCAGAGACTACACGCGAAAGACCTTATTATATTAGGTTAAGATATAGCCCG  
ATCCTTCTGTGAAGGAAGATAATTTTTTAACAAAATAAACATTTGCATTCTATTTATACTATCTATTTTGGTACTAC  
TCTAGTTGACTATTCTGCTTCATATTATATGGCTTACTTTAGTAGTGGCTCTTTCACACTGTCAATGGTGATGATCC  
TATCATTTCCCGGCCCTTCGTTTAAATTTACAGCATTTCAAACTAAGTTTGGTAAGGTTGTACCAGATACTTGGCTTC  
AATGGTTTATTGGTTTGGCTGAAGGTGATGGTTCACTAGGAGTTTGGGAATAAGCAGCTACGATTATTCTAACTCA  
AAAGGAAGGAAAGATCCTCTATGATATCCAATCTATATTGGATTGGAGAAGTTCTATATGTAGCACCAGGTATA  
TATGGAAATAAGTATGGTTTTATCGTTGGATTGTAACAAAGCCAGAAGATACATATCTTCTAATCCTTCTATTAA  
TGGAAATCTAGTTCCTTCTATCGGATTCAACAACCTAGGAGTCTGGCTCTCCACATATAATCTACGGAATACCGGT

GTATTCATAATTTCACTAATTACAACCTGTTGTTACAATTACACTAAATGATGCGTGGCTATCTGGTTTTACTGATGC  
TGAAGGATGTTTCAATGTTACTATTTCGAAAGAACCGTCTTTATGGTCTAGTAATACGATTCCCTCTAGATCAAAAG  
TGCCAAAAAACTCTAATGACTGTACAAACACTATTCAAGTTTCGGTACAGTAGCACTACGAAATAACACTAATGG  
AGTGTATCGATATGGAGCTAGTGGTATCGCCAATGTCTCAGTTATTTCGCACTTACTTTGATAAGTTTCCTCTACGAA  
CAAAGAAGCTATATTCTTACGAAAAGTGGTCACAAATTCACCTCTATGGCACTTGATAATAAGCATCGATCTCAAG  
AAGGATACGCCACTGTTATCGCTATTAAGGAGAGTATGAATGAATAATAAACTAATAAATATTTTGTAAAAAGAAT  
TCCAACATG

(HEG Accession pfam00961, interval 824-1111, E-value  $1.67 \times 10^{-12}$ )

(HEG Accession cl24136, interval 437-706, E-value  $9.98 \times 10^{-03}$ )

>LCR2002368\_COX1\_INTRON3\_VNI

AAACGAAGTGCTAGGCCCACTTCATATACTGGCCAACTATATTATTACTGTTTTGATACTATCGCAGTACCTCTTA  
GCTATCTATAACCTCGTGCAACCAAGTATAAGATTCTACCTAATAATACTTGTAAGTATTGTACCTTATGGTACC  
AATCAGGGTACCCTCTATTCAATATTATTACTCGAAATATGGTAGGTATCCCTTTCAATACTCTTTGTATTCTGGTTG  
GCATGATCCTTTCTGATGCTTGGATGATGAAGTGGGGCAACTCTAATGCTCGACTAGCAATCAAGCAATCCATTC  
GTAATTTTGGCTTTATCTGGCATTGTTTCCAGGTACTAGCTCATTATTGCTCAAGTATGCCCTCTATGGTACAATCG  
ACTCTTCCTTCTGGTATTCACTATGGGGTAAGTGTGTGACACGAACCTCTACCTTGCTTTACTATTCTCTATCATAT  
GTTCCATACTAATGGTGTGAAGACTATTCTATGGATATCTTCGACTATCTTACTCCACCATGCCTTGCTTTTGGGA  
TCATGGGAGATGTGGTGGAGGACTTTATCTACACACACAAACACTAGAAAGAAAATATTTCGACTACTTAATGCAC  
TAACTATTAAAGTATGATATTAAGGGGGTACTGGCGGAAGGACGTCATATTACAGTTCCCTCTATGCGGAAGCTATA  
CCCTATTCTAGCGCCACATATGCATCCTTCTATGATGTACAAGATTTTAAAGAGTATCAAGTAATAATATAGCGGG  
GCAAATTCGAGAGAACTCCTGTATATGGAATAAGTAACATATATAGGACAATCGTCGAACTAAATCATTAGTTGG  
AAACGGCTAATGTAAAAGCGTAGAGACTATACGCCCCAGGTCAACCTAAGTATTTATTAATATACGGTGATCTAA  
GACATAGTCCACTCCTTTAAGCAATTAAGGTAGACTCTTTTAGCCTAGATCTGAAATGATCGAAGAAAGAGTAG  
G

(HEG Accession cl03916, interval 223-549, E-value  $1.25 \times 10^{-28}$ )

>FC4\_COX1\_INTRON3\_VNIII

AAACGAAGTGCTAGGCCCACTTCATATACTGGCCAACTATATTATTACTGTTTTAATATTAACACAGTACCTCTTA  
ACTATCTGTACCCTCGTGCTACCAAGTATAAGATTCTACCTAATAATACTTGTAAGTATTGTACCATATGGTACC  
AATCTTGGTTCGACTGTAGGGTACCCTCAATTCAATATTATTATTCGAAATATGGTAGGTATCCCTTTCAATACTCT  
TTGTATTCTGGTTGGCATGATCCTTTCTGATGCTTGGATGATGAAGCACAAGCAGGGTAACTCTAATGCTCGACTA  
GCAATCAAGCAGTCCATTCATAATTTTGGCTTTATCTGGCATTGTTTCCAGGTGCTAGCTCATTATTGCTCAAGTAT  
GCCCTCTCTGGTACAATCGACTCTTCCTTCTGGTATTCACTATGGAGTTAGTGTGTGACACGAACCTCTACCTTGC  
TTTACTATTCTCTATCATATGTTCCATACTAATGGTGTGAAGACTATTCCCTATGGATATCTTCGACTATCTTACTCCA  
CCATGTCTTGCTTTTGGATCATCGGAGATGGAACCTATGGCTAATGGTGGAGGACTTTATCTACACACGCAATCCT  
TTACACTAGAAGAAAATATTTCGACTACTTAATGCACTAATTATTAAGTATGATATTAAGGGGGCACTACATAAGGC  
GGAAGGACGTCATATTATCTATATTACAGTTCCCTCTATGCGGAAGCTATACCTATTCTAGCACCGCATATGCATC  
CTTCTATGATGTACAAGATTTTAAAGAGTATCAAGTAATAATCAAGTAATAATATAGCGGGGGCAAATTCGAGAGA  
ACTCCTATATATGGAATAATTAACATATATAGGACAATCGTCGAACTAAATCATTAGTTGGAAACGGCTAATGTAA  
AAGCGTAGAGACTATACGCCCCAGGTCAATCTAAGTATTTATTAATATACGGTGATCTAAGACATAGTCCACTCCT  
TTAAGCAATTAAGGTAACCTCTTTTAGCCTAGATCTGAAATGATCGAATAAAGAGTAGG

(HEG Accession pfam03161, interval 239-742, E-value  $1.31 \times 10^{-49}$ )

>BT28\_COX1\_INTRON3\_VNIV

AAACGAAGTGCTAGGCCCACTTCATATACTGGCCAACTATATTATTACTGTTTTGATACTATCGCAGTACCTCTTA  
GCTATCTATAACCTCGTGCAACCAAGTATAAGATTCTACCTAATAATACTTGTAAGTATTGTACCTTATGGTACC  
AATCTTGGTTCGACTGTAGGGTACCCTCTATTCAATATTATTACTCGAAATATGGTAGGTATCCCTTTCAATACTCTT  
TGTAATCTGGTTGGCATGATCCTTTCTGATGCTTGGATGATGAAGGACAAGCGGGGCAACTCTAATGCTCGACTA  
GCAATCAAGCAATCCATTCGTAATTTTGGCTTTATCTGGCATTGTTTCCAGGTACTAGCTCATTATTGCTCAAGTAT  
GCCCTCTATGGTACAATCGACTCTTCCTTCTGGTATTCACTATGGGGTAAGTGTGTGACACGAACCTCTACCTTGC  
TTTACTATTCTCTATCATATGTTCCATACTAATGGTGTGAAGACTATTCCCTATGGATATCTTCGACTATCTTACTCCA  
CCATGCCTTGCTTTTGGATCATGGGAGATGGAGCTATGGCTAATGGTGGAGGACTTTATCTGCACACACAATCCT  
TTACACTAGAAGAAAATATTTCGACTACTTAATGCACTAACTATTAAGTATGATATTAAGGTGGCACTACATAAGGC  
GGAAGGACGTCATATTATTTATATTACAGTTCACTCTATGCGGAAGCTATACCTATTCTAGCGCCACATATGCATC

CTTCTATGATGTACAAGATTTTAAAGAGTATCAAGTAATAATATAGCGGGGCAAATTCGAGAGAACTCCTGTATAT  
GGAATAAGTAACATATATTGGACAATCGTCGAACTAAATCATTAGTTGGAAACGGCTAATGTAAAAGCGTAGAG  
ACTATACGCCCCAGGTCAACCTAAGTATTTATTAATATACGGTGATCTAAGACATAGTCCACTCCTTTAAGCAATT  
AAAGGTAGACTCTTTTAGCCTAGATCTGAAATGATCGAAGAAAGAGTAGG

(HEG Accession pfam03161, interval 236-739, E-value  $5.30 \times 10^{-53}$ )

>CFP59\_COX1\_INTRON3\_VGI

AAACGAAGTGCTAGGCCCACTTCATATACTGGCCAACTATATTATTACTGTTTTTAATATTATCACAGTACCTCTTA  
ACTATCTATACCCTCGTGCGACCAAGTATAAGATTCTACCTAATAATACTTGTAAGTATTGTACCATATGGTACC  
AATCTTGGTTCGACTGTAGGGTACCCCTCAATTCAATATTATTATTCGAAATATGGTAGGTATCCCTTTCAATACTCT  
TTGTATTCTGGTTGGCATGATCCTTTCTGATGCTTGGATGATGAAGCACAAGCAGGGTAACTCTAATGCTCGACTA  
GCAATCAAGCAGTCCATTCAATAATTTGGCTTTATCTGGCATTGTTTTCAGGTGCTAGCTCATTATTGCTCAAGTAT  
GCCCTCTCTGGTACAATCGACTCTTCCTTCTGGIATTCACTATGGAGTTAGTGTGTGACACGAACCTACCTTGC  
TTTACTATTCTTTATCATATGTTCCATACTAATGGTGTGAAGACTATTCCTATGGATATCTTCGACTATCTTACTCCA  
CCATGCTCTGCTTTTTGGATCATGGGAGATGGAACCTATGGCTAATGGTGGAGGGCTTTATCTACACACACAATCCT  
TTACACTAGAAGAGAATATTTCGACTACTTAATGCACTAATTATTAAGTATGACATTAAGGGGGCACTACATAAGG  
CGGAAGGACGTCATATTATCTATATTACAGTTCCTCTATGCGGAAGCTATATCCTATTCTAGCACCGCATATGCAT  
CCTTCAATGATGTACAAGATTTTAAAGAGTATCAAGTAATAATCAAGTAATAATATAGCGGGGCAAATTCGAGAG  
AACTCCTATATATGGAATAAGTAACATATATAGGACAATCGTCGAACTAAATCATTAATTGGAAACGGCTAATGTA  
AAAGCGTAGAGACTATACGCCCCAGGTCAACCTAAGTATTAATTAATATACGGTGATCTAAGACATAGTCCACTC  
CTTTAAGCAATTAAAGGTAGACTCTTTTAGCCTAGATCTGAAATGATCGAAGAAAGAGTAGG

(HEG Accession pfam03161, interval 239-742, E-value  $2.42 \times 10^{-51}$ )

>CFP61\_COX1\_INTRON3\_VGIII

AAACTAAGTGTTAGGTCCACTTTATTAAGTGGCCAACTATATTATTAAGTTAAATATAGCGGGGCAAATTCGAGA  
GAACTCCTATATATGGAATAAGTAACATATATAGGACAATCGTCGAACTAAGTCATTAGTTGTAAACGATTAATGT  
AAAAGCGTAGAGACTATACGCCCCAGGTAAACCTAAGTATTATAATAATATATGGTGATCTAAGACATAGTCCAC  
TCCTTTGAGTAATTAAGGTAGACTCTTTTAGCCTAAGTCTGAAATGATTAAATAAAGAGTAGG

>FC4\_COX1\_INTRON4\_VNIII

ACAAATTTTGCAAGATGGCGCAGTACTTACTCTTGAATTTTCATCTCCTGTCACGTATTAACCTACCTAATAATA  
AGCCAGATGTTTCATATCTAGGTCCTTTTACAGTAGGACTGATTGATGGTGATGGTTCTATTTCAGGTAAATCATTG  
GCGAAGTAAGACACTACAATATCGTATTGTAGTAAAGATAGCTATTCGTCCTATTAATGAAAATATGCTGCAAAC  
AATTGCTAAGACATACGGTGTTATGTAAAGCTAGATATTAAGAACGGTTTGTCTGCTGGATTGTAAATGACCAA  
CAAACAATCCGTCAAAGATTCTACCGCTATTGCTCTATATCCTCCTCTCACTACACGTGTAACCTCTTCAACTAG  
CTTTCATGATCAAGGCCCTAAGTGGTATGACTATGGAAGAATATTTTGCTACTCGTAGTAGTAAGTATCGACAAGC  
AATTACACCTCTATTTTCAACAGTACCTATTTATTTTGCTCCTTGGCTATCTGGTTTTATTGAAGCTGAAGGATCATG  
GGTTCGTCGAACTTCAGTACCTTTTGGGTTTAGCTTTAGTATTGCACAATGTAATGATCTATATCTAGTTGAAGCAA  
TTCTTGCTTACTTTGGCCAATCTCATCTAACGGTACAGGAACACGAGTGCCATTCAATCGTATGCCTATTTACCA  
AATTGAAATTTCAAATCGTATTGGTGTGAAAAGGTAGTACAACATTGTCTAGATAATCCACTACTAGGATATAAG  
TATTATCAACTAGCTTCAGCAATTGAAGATTCAAAGAATCTGTCACATCTGCGCCATTCTTTTTTAAAGTAAGTGT  
CATGCCGTCATATCGCTATGAGAGATATTAGTTAACTCTCGGTGCGATTTTTTAATTGGCTAACGGTGAAACCTTATT  
CTGTCCGCTACAGACTATAACAAGGGATAAGGCAATACCGTGGAACCTTAAAAGGACTCCGTAGAGACTAC  
ACGCGATAACGTATTAGTACGCTTCTTTAGATGCCGTCTAATACGTAAGATATAGTCCGATCCTGATTGTAAAA  
TCAGTAACTAATCCTATTATTTTATAGGTTTTTAAAGACT

(HEG Accession pfam00961, interval 109-384, E-value  $4.68 \times 10^{-12}$ )

>FC4\_COX1\_INTRON5\_VNIII

CTGAATTGGGCCACTTAAAATCTGGTGAATTACAAGAATATCTATATTAGACAACCTGTAGCCTAGATTAGATTAG  
TATTTATATAGTATAATATAATAGATCTAATAAGGTTCAACGACTAACTGGTGAGTAATACTAACAATAATCCAGA  
CACGAGCGCCAGAATGCTATAATTATAGCATATGACATAGTCTAATCTGTGGTGTGAGCTACAGGATCAGGATTA  
AATACTTGATCACAATATTATATGC



>BT28\_COX1\_INTRON4\_VNIV

ACAAATTTTGTCAAGAAATGGCGCAGTACTTACTCTTGAATTTTCATCTCCTGTCACGTATTAACTACCTAATAATA  
AGCCAGATGTTTCATATCTAGGTCCTTTTACAGTAGGACTGATTGATGGTGATGGTTCTATTTCAGGTAAATCATTG  
GCGAAGTAAGACACTACAATATCGTATTGTAGTAAAGATAGCTATTTCGTCCATTTAATGAAAATATGCTGCAAAC  
AATTGCTAAGACATACGGTGTTATGTGAAGCTAGATATTAAGAACGGTTTGTTCGTGCGATTGTAAATGACCA  
ACAAACAATCCGTCAAAAGATTCTACCGCTATTGCTCTATATCCTCCTCTCACTACACGTGTAACCTCTTCAACTA  
GCTTTCATGATCAAGGCCCTAAGTGGTATGACTATGGAAGAATATTTTGCTACTCGTAGTAGTAAGTATCGACAAG  
CAATTACACCTCTATTTTCAACAGTACCTATTTATTTTGCTCCTTGGCTATCTGGTTTTATTGAAGCTGAAGGATCAT  
GGGTTTCGTGCGAAGTTCAGTACCTTTTGGGTTTAGCTTTAGTATTGCACAATGTAATGATCTATATCTAGTTGAAGCA  
ATTCTTGCTTACTTTGGCCAATCTCATCTAACGGTACAGGAACACGAGTGCCATTCAATCGTATGCCTATTTACC  
AAATTGAAATTTCAAATCGTATTGGTGTGAAAAGGTAGTACAACATTGTCTAGATAATCCACTACTAGGATATAA  
GTATTATCAACTAGCTTCAGCAATTGAAGATTCAAAGAATCTGTACATCTGCGCCATTCTTTTTTAAGTAAGTG  
TCATGCCGTCATATCGCTATGAGAGATATTAGTTAACTCTCGGTCGATTTTTTAATCGGCTAACGGTGAAACCTTAT  
TCTGTCCGCTACAGACTATAAACAAGGGATAAGGCAATACCGTGGGAACCTTAAAGGACTCCGTAGAGACTAC  
ACGCGATAACGTATTAGTACGCTTCTTTAGATGCCCCGTCTAATACGTAAGATATAGTCCGATCCTGATTGTA  
TCAGTAACTAATCCTATTATTTTATAGTTTTTAAAGACT

(HEG Accession pfam00961, interval 109-384, E-value  $4.68 \times 10^{-12}$ )

>BT28\_COX1\_INTRON5\_VNIV

CTGAATTGGGCCACTTAAAATCTGGTGAATTACAAGAATATCTATATTAGACAACCTGTAGCCTAGATTAGATTAG  
TATTTATATAGTATAATATAATAGATCTAATAAGGTTCAACGACTAACTGGTGAGTAATACTAACAATAATCCAGA  
CACGAGCGCCAGAATGCTATAATTATAGCATATGACATAGTCTAATCTGTGGTGTGAGCTACAGGATCAGGATTA  
AATACTTGATCACAATATTATATGC

>CFP59\_COX1\_INTRON4\_VGI

ACAAATTTTGTCAAGGATGGCGCAGTACTTACTCTTGAATTTTCATCTCCTGTCACGTATTAACTACCTAATAATA  
AGCTAGATGCTTCATATCTAGGTCCTTTTACAGTAGGACTGATTGATGGTGATGGTTCTATTTCAGGTAAATCATTGG  
CGAAGTAAGACACTACAATATCGTATTGTAGTAAAGATAGCTATTTCGTCCATTTAATGAAAATATGCTGCAAATAA  
TTGCTAAGGCATACGGTGGAATGTAAAGCTAGATACTAATAACGGTTTGTTCGTGCGATTGTGAATGACCAAC  
AAACAATCCGTCAAAAGATTCTACCCCTATTGCTATGTATCCTCCTCTTACTACACGTGTAACCTCTTCAACTAGC  
TTTCATGATGAAGGCTATAAGTGGTATGACTATGGAAGAATACCTTGCTACTCGAGGTAGTAAGCTTAAACAATCG  
ACAAGCAATAACACCTCTATTTTCAACAGTACCTATTTATTTTGCTCCTTGGCTATCTGGTTTTATTGAAGCTGAAG  
GATCATGGGTTTCGTGCAATTCAGTACCTTTCCGATTAGCTTTAGTATTGCACAATGTCACGATCGATATCTGGTT  
GAAGCTATTCTTGCTTACTTTGGCCAATCTCATCTAAAGGTACAGGTACCTCGAGTGCCTCTCAATCGTATGCCTA  
TTTATCAATTTGAAAATTTCAAATCGTATTGGTGTGAAAAGGTAGTACAACATTGTATTGATAATCCACTACTAGG  
ATATAAGTATTATCAACTAGCTTCAGCAATTGAAGATTCAAAGAATCTGTACATCTGCGCCATTCTTTTTTAAAGT  
AAGTGTATGCCGTCATATCGCTATGAGAGATATTAGTTAACTCTCGGTCAGTTTTACTGGCTAACGGTGAAACCT  
TATTCTGTCCGCTACAGACTATAAACAAGGATAAGGCAATACCGTGGGAACCTTAAAGGACTCCGTAGAGAC  
TACACGCGATAACATATTATTACGCTTCTTTAGATGCCCCGTCTAATATGTAAGATATAGTCCGATCCTGATTGTA  
ATCAGTAACTAATCCCATTTATTTATAGG

(HEG Accession pfam00961, interval 109-384, E-value  $5.67 \times 10^{-13}$ )

(HEG Accession cl24136, interval 508-774, E-value  $7.46 \times 10^{-03}$ )

>BT27\_COX1\_INTRON4\_VGII

ACAAATTTTGTCAAGGATGGCGCAGTACTTACTCTTGAATTTTCATCTCCTGTCACGTATTAACTACCTAATAATA  
AGCTAGATGCTTCATATCTAGGTCCTTTTACAGTAGGACTGATTGATGGTGATGGTTCTATTTCAGGTAAATAATTGG  
CGAAGTAAGACACTACAATATCGTATTGTAGTAAAGATAGCTATTTCGTCCATTTAATGAAAATATGCTGCAAATAA  
TTGCTAAGGCATACGGTGGAATGTAAAGCTAGATATTAAGAACGGTTTGTTCGTGCGATTGTGAATGACCAAC  
AAACAATCCGTCAAAAGATTCTACCTCTATTGCTATGTATCCTCCTCTTACTACACGTGTAACCTCTTCAACTAGCT  
TTCATGATGAAGGCTATAAGTGGTATGACTATGGGAGAATACTTTGCTACTCGTGGTAGTAAGCTTAAACGATCGA  
CAAGCAATTACACCTCTATTTTCAACAGTACCTATTTATTTTGCTCCTTGGCTATCTGGTTTTATTGAAGCTGAAGG  
ATCATGGGTTTCGTGCAATTTTCAGTACCTTTGGATTAGTTTTAGTATTGCACAATGTCACGATCGATATCTGGTTG  
AAGCTATTCTTGCTTACTTTGGCCAATCTCATCTAAAGGTACAGGTACCTCGAGTGCCTTCAATCGTATGCCTATT

TACCAATTTGAAATTTCAAATCGTATTGGTGTGAAAAGGTAGTACAACATTGTCTAGATAATCCACTACTAGGAT  
ATAAGTATTATCAACTAGCTTCAGCAATTGAAGATTCAAAGAATCTGTCACATCTGCGCCATTCTTTTTTAAGTA  
AGTGTATGCCGTCATATCGCTATGAGAGATATTAGTTAACTCTCGGTCGATTTTTATCGGCTAACGGTGAAACC  
TTATTCTGTCCGCTACTGACTATAAAACAAGGGATAAGGCAATACCGTGGAACCTTAAAGGACTCCGTAGAG  
ACTACACGCGATAACGTATTAGTACGCTTCTTTAGATGCCCCGTCTAATATGTAAATATAGTCCGATCCTGATTGTG  
AAATCAGTAACTAACCTATTATTTAATAGGTTATTAAGACT

(HEG Accession pfam00961, interval 109-384, E-value  $1.07 \times 10^{-11}$ )

>CN894\_COX1\_INTRON4\_VGII

ACAAATTTTGTCAAGGATGGCGCAGTACTTACTCTTGAATTTTCATCTCCTGTCACGTATTAACCTACCTAATAATA  
AGCTAGATGCTTCATATCTAGGTCCTTTTACAGTAGGACTGATTGATGGTGATGGTTCTATTCAGGTAAATAATTGG  
CGAAGTAAGACACTACAATATCGTATTGTAGTAAAGATAGCTATTTCGTCATTAAATGAAAATATGCTGCAAATAA  
TTGCTAAGGCATACGGTGGTAATGTAAAGCTAGATATTAAGAACGGTTTTGTTCTGTGGATTGTGAATGACCAAC  
AAACAATCCGTCAAAAGATTCTACCTCTATTGCTATGTATCCTCCTCTACTACACGTGTAACCTTTCAACTAGCT  
TTCATGATGAAGGCTATAAGTGGTATGACTATGGGAGAATACTTTGCTACTCGTGGTAGTAAGCTTAACGATCGA  
CAAGCAATTACACCTCTATTTTCAACAGTACCTATTTATTTTGTCTCTGGCTATCTGGTTTTATTGAAGCTGAAGG  
ATCATGGGTTTCGTCGAATTTTCAGTACCTTTTGGATTAGTTTAAATATTGCACAATGTCACGATCGATATCTGGTTG  
AAGCTATTCTTGCTTACTTTGGGCAATCTCATCTAAAGGTACAGGTACCTCGAGTGCCTTTCAATCGTATGCCTATT  
TACCAATTTGAAATTTCAAATCGTATTGGTGTGAAAAGGTAGTACAACATTGTCTAGATAATCCACTACTAGGAT  
ATAAGTATTATCAACTAGCTTCAGCAATTGAAGATTCAAAGAATCTGTCACATCTGCGCCATTCTTTTTTAAGTA  
AGTGTATGCCGTCATATCGCTATGAGAGATATTAGTTAACTCTCGG

(HEG Accession pfam00961, interval 109-384, E-value  $7.76 \times 10^{-12}$ )

>CN894\_COX1\_INTRON5\_VGII

CATGGATATGACAACTTTACACTGTCTATTCAAGCACTAGGTCCTACAGACTCTGGTCAAATTTATTCACCATCAA  
ACCTTATGTAGTACTAGAACAAGCCTATCTTAGCTCATACACTCTTGCTTACAATGTTAACCGAGTAGCTAGCTCA  
GCCGCTTACACTCCATCTACATCGCTAGTTAATGTCGGTACTGACAACCCATCTTATGGTCTATTTGGACTAAGTT  
CATATGCATGGAATAATACACATAGTGAAGCACTAAAGGCATTTTGGTCTGAGGAAAGTATAACTTCTTTGTATAT  
GATAGTAGTACTCTACTACTACTACAACATTTTACTAGTGCTACTCAACTATCTAATCTTTGAAATGAGTAAGC  
GATTTGGTACTGATATTGTAAAGAAGCTCCAAAGCCTAAACCAACCAGCACTACTATATAGTAGTTTTATTATTTC  
ACTGGTAGAGCTTACAGATGCACAACACTACAAGATCTGCTACCTAATATGCCAGTTAAGGCTATTATTATTCCTCGA  
CCAGCTAGTCCTACAGGTAAGGTTATTTACGGCTATAACCCCGAAACTAATATTTATGAATCTTGGTCTAGTCTAG  
AAAAGTGTAACATATGCTAACTGGTGCTCGATTGCGAATAAGAGCACCGTTAATAAGCGGATTAATAAGGGA  
ATTCTATTTTCATGGTTATTATCTACAACTAAGCCATTTAATAGGAGGAGTGGGCCACTTTAAATCTGGTGAATTA  
CAAGAACATCTATACTCTAGACAACTTGTAAGCCAAAATTAGATTAGTATTTACATACTGTAAAGGATCTAAAAAG  
GTTCAACGACTAATGGGTGAGTAATACTAACAATAATCCCAACACGAGCGCCAGAATACTATATATTATAGTATAT  
GACATAGTCTAATCTGTGGCGCGAGTCGCAGGATCAGAGTTAAATATCTGATCATAATATAAAGC

>FC3\_COX1\_INTRON4\_VGIII

ACAAATTTTGTCAAGAAATGGCGCAGTACTTACTCTTGAATTTTCATCTCCTGTCACGTATTAACCTACCTAATAATA  
AGCCAGATGTTTCATATCTAGGTCCTTTTACAGTAGGACTGATTGATGGTGATGGTTCTATTCAGGTAAATCATTG  
GCGAAGTAAGACACTACAATATCGTATTGTAGTAAAGATAGCTATTTCGTCATTAAATGAAAATATGCTGCAAAC  
AATTGCTAAGACATACGGTGGTTATGTGAAGCTAGATATTAAGAACGGTTTTGTTCTGTGGATTGTAAATGACCA  
ACAAACAATCCGTCAAAAGATTCTACCGCTATTGCTCTATATCCTCCTCTCACTACACGTGTAACCTTTCAACTA  
GCTTTCATGATCAAGGCCCTAAGTGGTATGACTATGGAAGAATATTTTGCTACTCGTAGTAGTAAGTATCGACAAG  
CAATTACACCTCTATTTTCAACAGTACCTATTTATTTTGCACCTTGGCTATCTGGTTTTATTGAAGCTGAAGGATCA  
TGGGTTTCGTCGAACCTTCAGTACCTTTTGGGTTTAGCTTTAGTATTGCACAATGTAATGATCTATATCTAGTTGAAGC  
AATCTTGCTTACTTTGGCCAATCTCATCTAACGGTACAGGAACACGAGTGCCATTCAATCGTATGCCTATTTTAC  
CAAAATGAAATTTCAAATCGTATTGGTGTGAAAAGGTAGTACAACATTGTCTAGATAATCCACTACTAGGATATA  
AGTATTATCAACTAGCTTCAGCAATTGAAGATTCAAAGAATCTGTCACATCTGCGCCATTCTTTTTTAAAGTAAGT  
GTCATGCCGTCATATCGCTATGAGAGATATTAGTTAACTCTCGGTCGATTTTTTAAATCGGCTAACGGTGAAACCTT  
ATTCTGTCCGCTACAGACTATAAAACAAGGGATAAGGCAATACCGTGGAACCTTAAAGGACTCCGTAAAAGACT  
ACACGCGATAACGTATTAGTACGCTTCTTTAGATGCCCCGTCTAATACGTAAGATATAGTCCGATCCTGATTGTAA  
AATCAGTAACTAATCCTATTATTTATAGGTTTTTAAAGACTNNNTACTATGTAGTGGCT

(HEG Accession pfam00961, interval 109-384, E-value  $4.80 \times 10^{-12}$ )

>FC3\_COX1\_INTRON5\_VGIII

CTGAATTGGGCCACTTAAAATCTGGTGAATTACAAGAATATCTATATTAGACAACCTGTAGCCTAGATTAGATTAG  
TATTTATATAATATAATAGATCTAATAAGGTTCAACGACTAACTGGTGAGTAATACTAACAATAATCCAGACACGA  
GCGCCAGAATGCTATAATTATAGCATATGACATAGTCTAATCTGTGGTGTGAGCTACAGGATCAGGATTAAATACT  
TGATCACAATATTATATGC

>FC9\_COX1\_INTRON4\_VGIV

ACAAATTTTGTCAAGGATGGCGCAGTACTTACTCTTGAATTTTCATCTCCTGTACGTATTAACTACCTAATAATA  
AGCTAGATGCTTCATATCTAGGTCCTTTTACAAGTAGGACTGATTGATGGTGATGGTTCTATTCAGGTAAATCATTGG  
CGAAGTAAGACACTACAATATCGTATTGTAGTAAAGATAGCTATTCGTCCATTTAATGAAAAATATGCTGCAAATAA  
TTGCTAAGGCATACGGTGGTAATGTAAAGCTAGATACTAATAACGGTTTTGTTCTGTGGATTGTGAATGACCAAC  
AAACAATCCGTCAAAAGATTCTACCCCTATTTGCTATGTATCCTCCTCTTACTACACGTGTAACCTTCAACTAGC  
TTTCATGATGAAGGCTATAAGTGGTATGACTATGGAAGAATACTTTGCTACTCGAGGTAGTAAGCTTAACAATCG  
ACAAGCAATAACACCTCTATTTTCAACAGTACCTATTTATTTTGCTCCTTGGCTATCTGGTTTTATTGAAGCTGAAG  
GATCATGGGTTTCGTGCAATTCAGTACCTTTTGGATTAGCTTTAGTATTGCACAATGTCACGATCGATATCTGGTT  
GAAGCTATTCTTGCTTACTTTGGCCAATCTCATCTAAAGGTACAGGTACCTCGAGTGCCTCTCAATCGTATGCCTA  
TTTATCAATTTGAAATTTCAAATCGTATTGGTGTGAAAAGGTAGTACAACATTGTATTGATAATCCACTACTAGG  
ATATAAGTATTATCAACTAGCTTCAGCAATTGAAGATTCAAAGAATCTGTACATCTGCGCCATTCTTTTTTTAAGT  
AAGTGTCATGCCGTCATATCGCTATGAGAGATATTAGTTAACTCTCGGTCAGTTTTACTGGCTAACGGTGAGACCT  
TATTCTGTTGCTACAGACTATAAAACAAAGGATAAGGCAATACCGTGGGAACCTTAAAAGGACTCCGTAGAGAC  
TACACGCGATAACATATTATTACGCTTCTTTAGATGCCCCTAATATGTAAGATATAGTCCGATCCTGATTGTAA  
ATCAGTAACTAACCAAGACT

(HEG Accession pfam00961, interval 109-384, E-value  $5.59 \times 10^{-13}$ )

(HEG Accession cl24136, interval 508-774, E-value  $8.49 \times 10^{-03}$ )
