# Supplementary material for: Distribution and Polymorphisms of Group I Introns in Mitochondrial Genes from Cryptococcus neoformans and Cryptococcus gattii
Source: J Fungi (Basel). 2023 May 30;9(6):629. doi: 10.3390/jof9060629 (PMC10299519; doi:10.3390/jof9060629)
Supplement: Supplementary file 1 [file jof-09-00629-s001.zip]

Archive with 4 entries (4 files):
- Supplementary File S1_Isolates.pdf
- Supplementary File S2_Amplicons.pdf
- Supplemetary File S3_Eletrophoresis.pdf
- Supplemetary File S4_Fasta sequences.pdf
